# Supplementary material
Source: Springer Nature journal article supplement (https://www.springermedizin.de/resource/supplementary/12943_2007_363_MOESM2_ESM.pdf/9554018)

**A**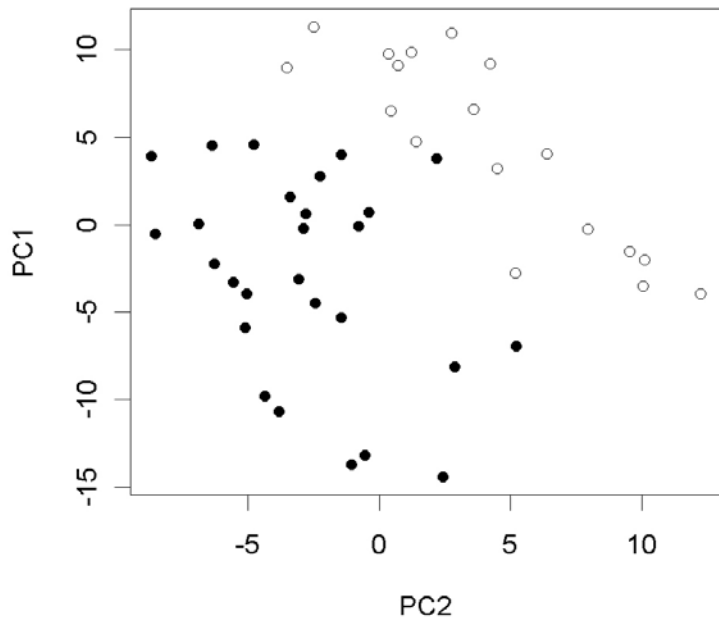**B** $p=0.0046$ 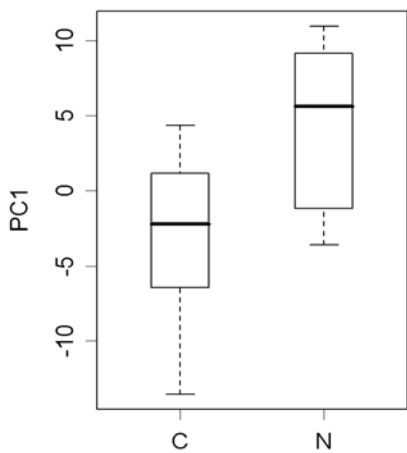**C** $p=0.0002$ 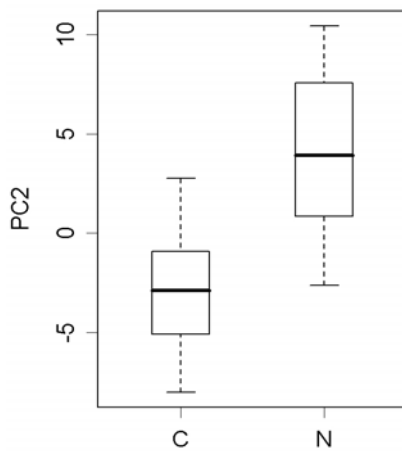

Supplement: MOESM2 [file 9554018]
